# Supplementary material for: Bromodomain and Extraterminal Protein Inhibitor, Apabetalone (RVX-208), Reduces ACE2 Expression and Attenuates SARS-Cov-2 Infection In Vitro
Source: MDPI journal article supplement (doi:10.3390/biomedicines9040437), 2021-04-18
Supplement: s1 [file s1]

Table S1

Table S1: Characteristics of Primary Human Hepatocyte Donors

| Donor # | Sex | Race      | Smoking | Cause of Death | Age | BMI | Medications   |
|---------|-----|-----------|---------|----------------|-----|-----|---------------|
| Donor 1 | M   | Caucasian | no      | MVA            | 3   | 15  | None reported |
| Donor 2 | F   | Caucasian | yes     | stroke         | 47  | 22  | None reported |
| Donor 3 | F   | Caucasian | yes     | n/a            | 70  | 21  | None reported |

n/a = not available. MVA = motor vehicle accident. BMI = body mass index (kg/m<sup>2</sup>)

Fig. S1

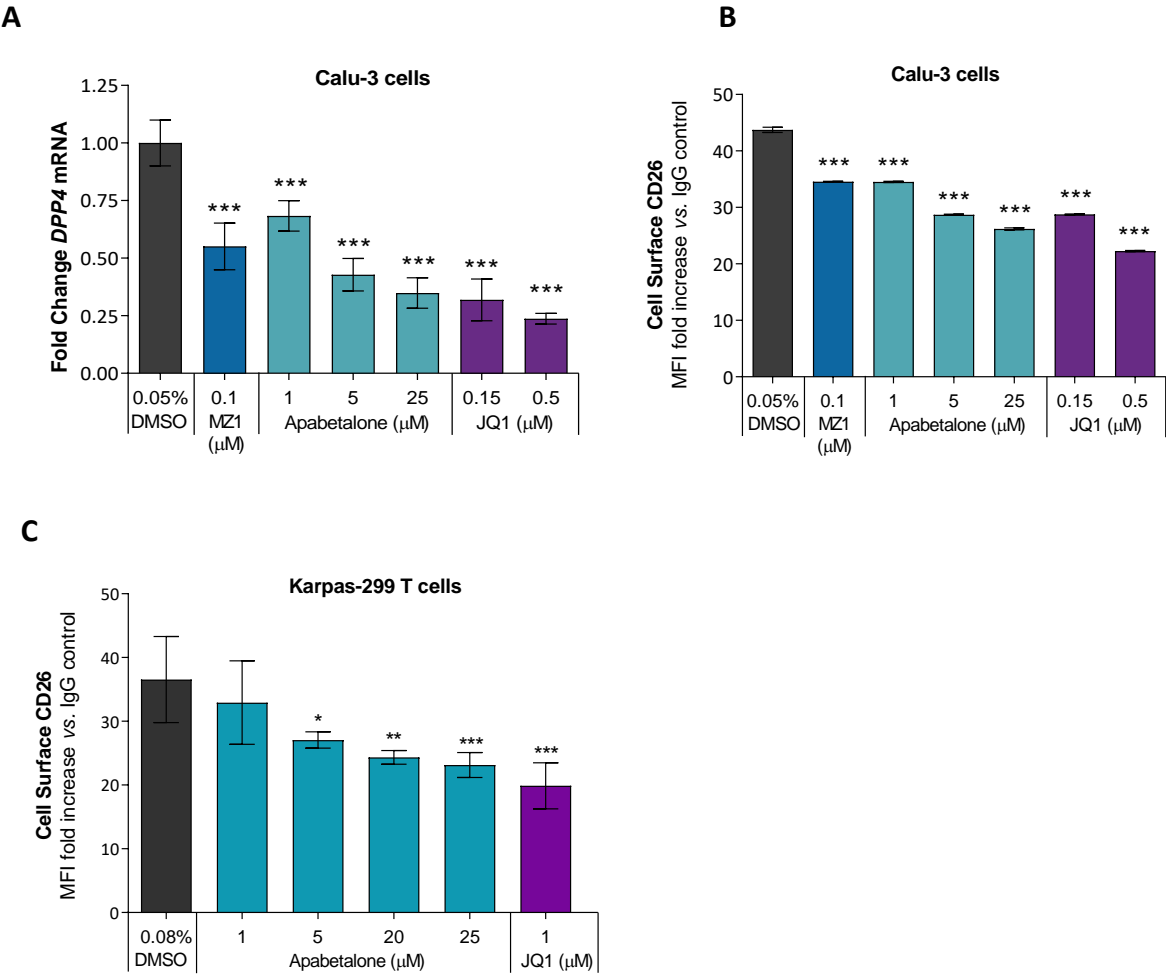

**Fig. S1:** Evaluation of *DPP4* gene expression and CD26 protein levels in Calu-3 lung epithelial cells (A-B) or Karpas-299 T cells (C) following 48 h treatment with the indicated BETi compounds or vehicle alone (DMSO). *DPP4* mRNA levels were quantified by real-time PCR using cyclophilin as a reference gene. Transcript levels of *DPP4* are presented as fold change relative to DMSO treated cells (A). Flow cytometric analysis of cell surface expression of DPP4 (CD26) in Calu-3 cells (B) or Karpas-299 cells (C) was estimated as MFI fold increase vs. IgG control. Experiments were performed at least 3 independent times. \* $p < 0.05$ , \*\* $p < 0.01$ , \*\*\* $p < 0.001$ , one-way ANOVA followed by Dunnett's multiple comparison test

Fig. S2

A

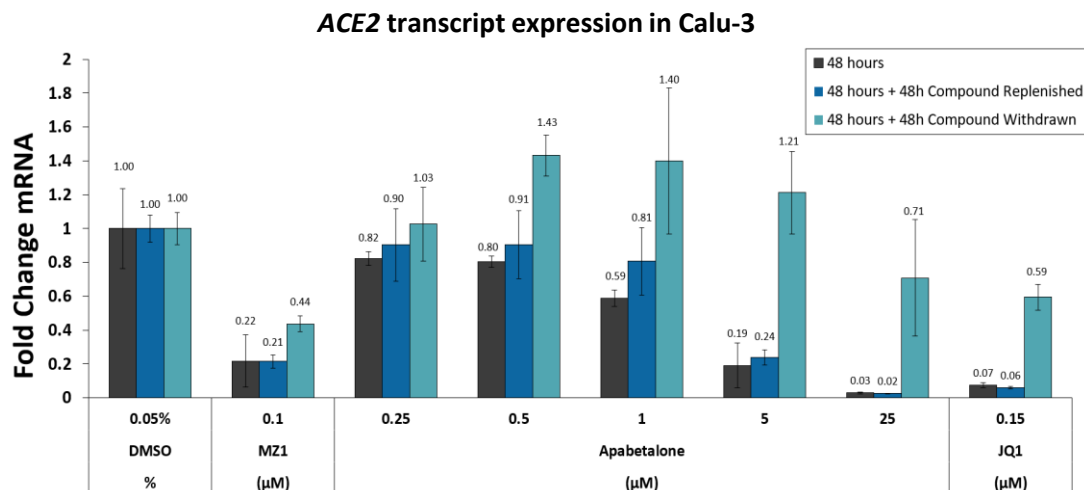

B

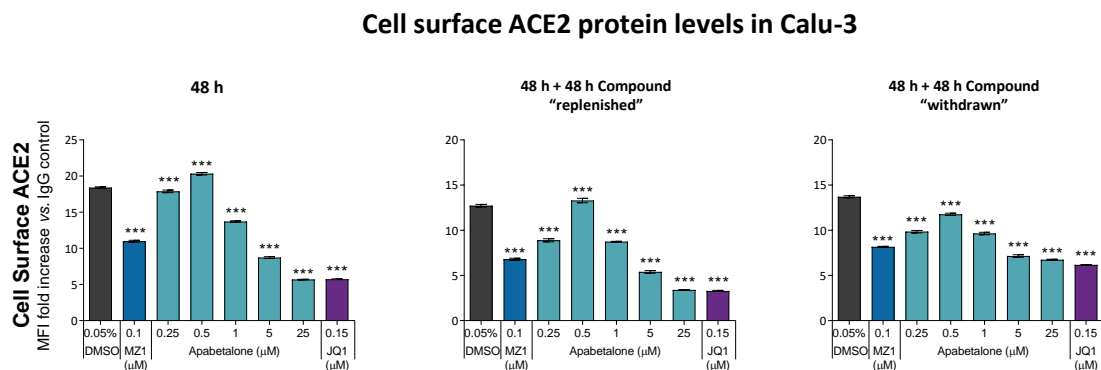

**Fig. S2:** Comparison of *ACE2* gene expression and cell surface protein levels in BETi treated Calu-3 cells. Calu-3s were pre-treated with the indicated BETi for 48 h, washed and then replenished with complete medium +/- BETi for another 48 h. Cells were harvested at 48 h, or 96 h (BETi replenished or withdrawn) and assessed for *ACE2* mRNA levels by real-time PCR (A) or cell surface *ACE2* protein levels by flow cytometry (B). Experiments were performed at least 3 independent times. \* $p < 0.05$ , \*\* $p < 0.01$ , \*\*\* $p < 0.001$ , one-way ANOVA followed by Dunnett's multiple comparison test.

Fig. S3

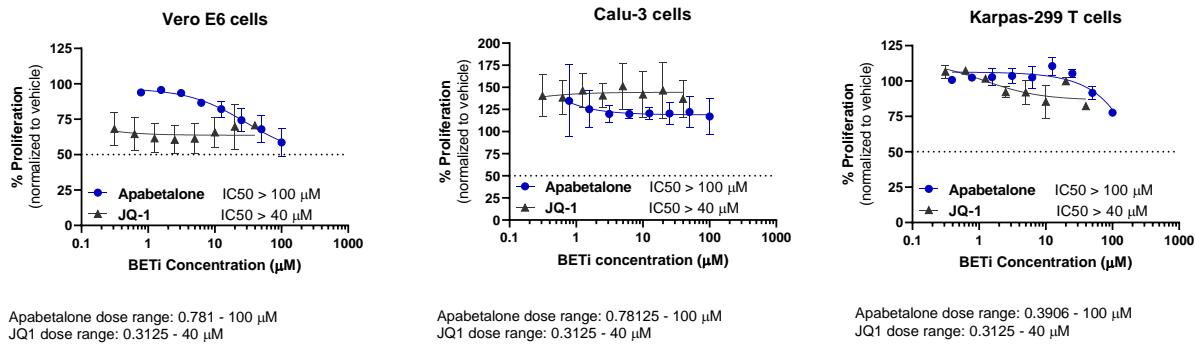

**Fig. S3:** Effect of BETi on cell viability in the absence of SARS-CoV2 infection. Effects of BETi following 48 h treatment on proliferation of un-infected Vero E6, Calu-3 and Karpas-299 T cells was evaluated by MTS assay (n=3/BETi concentration tested).  $\text{IC}_{50}$  concentrations were not reached at the tested concentrations as indicated by the dotted line.
